# Supplementary material
Source: MDPI journal article supplement (https://www.mdpi.com/2227-9040/11/11/554)
Supplement: s1 [file s1 › chemosensors-2699662-supplementary.pdf]

## Supporting Information

### **Au-coated ZnO Surface-Enhanced Raman Scattering (SERS) Substrates: Synthesis, Characterization, and Applications in Exosome Detection**

**Samuel Adesoye <sup>1</sup>, Saqer Al Abdullah <sup>1</sup>, Anjali Kumari <sup>1</sup>, Gayani Pathiraja <sup>2</sup>, Kyle Nowlin <sup>2</sup> and Kristen Dellinger <sup>1,\*</sup>**

<sup>1</sup> Department of Nanoengineering, Joint School of Nanoscience and Nanoengineering, North Carolina A&T State University, 2907 E Gate City Blvd, Greensboro, NC 27401, USA; soadesoye@aggies.ncat.edu (S.A.); smalabdullah@aggies.ncat.edu (S.A.A.); akumari@aggies.ncat.edu (A.K.)

<sup>2</sup> Department of Nanoscience, Joint School of Nanoscience and Nanoengineering, University of North Carolina at Greensboro, 2907 E Gate City Blvd, Greensboro, NC 27401, USA; gcpathir@uncg.edu (G.P.); ksnowlin@uncg.edu (K.N.)

\* Correspondence: kdellinger@ncat.edu

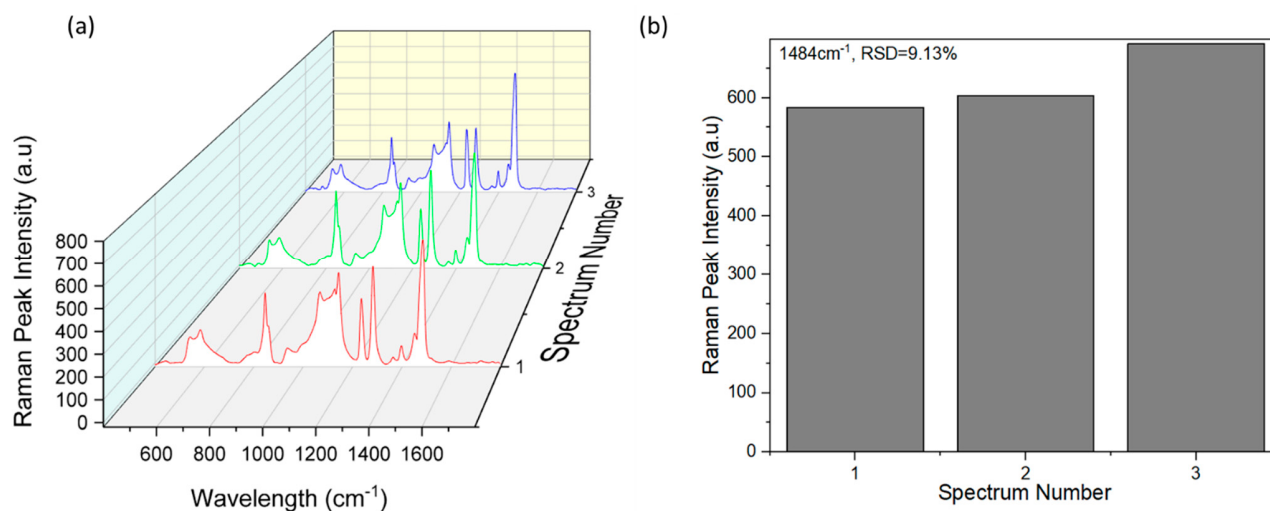

**Figure S1.** (a) SERS spectra of three random measurements of N2a on the optimal substrate (b) SERS peak intensity at wavelength 1484cm<sup>-1</sup> of the three random measurements of N2a on the optimal substrate.

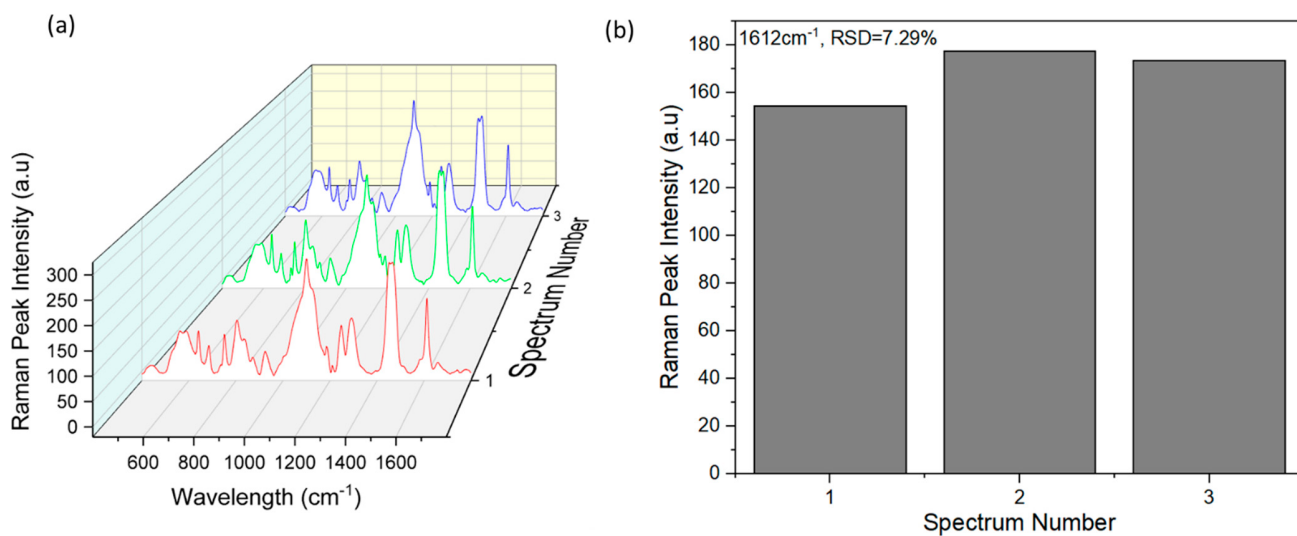

**Figure S2.** (a) SERS spectra of three random measurements of RAW 264.7 on the optimal substrate (b) SERS peak intensity at wavelength 1612cm<sup>-1</sup> of the three random measurements of RAW 264.7 on the optimal substrate.

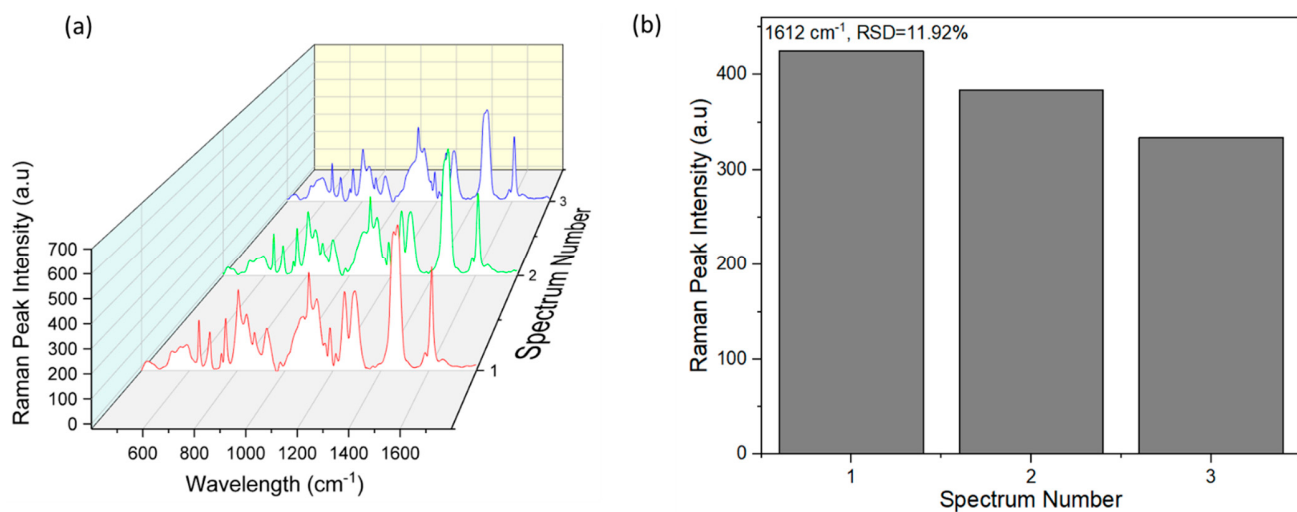

**Figure S3.** (a) SERS spectra of three random measurements of MCF-7 on the optimal substrate (b) SERS peak intensity at wavelength 1612 cm<sup>-1</sup> of the three random measurements of MCF-7 on the optimal substrate.
